# Supplementary material for: Olesoxime suppresses calpain activation and mutant huntingtin fragmentation in the BACHD rat
Source: Oxford University Press journal article supplement (doi:10.1093/brain/awv290), 2015-10-21
Supplement: awv290_Supplementary_Data.zip [file awv290_Supplementary_Data.zip]

Archive with 5 entries (5 files):
- brain-2015-00779-File014.tif
- brain-2015-00779-File010.pdf
- brain-2015-00779-File011.pdf
- brain-2015-00779-File012.docx
- brain-2015-00779-File013.docx
