# Supplementary material for: Olesoxime suppresses calpain activation and mutant huntingtin fragmentation in the BACHD rat
Source: Oxford University Press journal article supplement (doi:10.1093/brain/awv290), 2015-10-21
Supplement: awv290_Supplementary_Data.zip [file awv290_Supplementary_Data.zip › brain-2015-00779-File011.pdf]

## Cohort I

### Treatment and safety parameters

#### Olesoxime treatment

Body weight

Food intake

Blood sampling

### Behavior

Clasping behavior

Rotarod motor performance

SST cognitive flexibility

EPM anxiety-like behavior

### Neuropathology

MRI brain size

Tissue sampling

Soluble and aggregated mHTT

Full-length and truncated mHTT

Calpain and caspase activation

Mitochondrial function

Ca<sup>2+</sup> signalling-related proteins

0 1 2 3 4 5 6 7 8 9 10 11 12 13

0 1 2 3 4 5 6 7 8 9 10 11 12 13

Age (months)

## Cohort II

### Treatment and safety parameters

#### Olesoxime treatment

Body weight

Food intake

Blood sampling

Tissue sampling

0 1 2 3 4 5 6 7 8 9 10 11 12 13

Age (months)
