# Supplementary material for: Olesoxime suppresses calpain activation and mutant huntingtin fragmentation in the BACHD rat
Source: Oxford University Press journal article supplement (doi:10.1093/brain/awv290), 2015-10-21
Supplement: awv290_Supplementary_Data.zip [file awv290_Supplementary_Data.zip › brain-2015-00779-File012.docx]

**Supplementary Table 1: Antibodies for Western blot immunodetection.**

| **Antibody** | **Dilution** | **Source** | |
| --- | --- | --- | --- |
| Mouse anti-ATP5a | 1:2000 | ab110413 | Abcam |
| Mouse anti-β-actin | 1:10,000 | clone AC-15. A5441 | Sigma Aldrich |
| Rabbit anti-calpain-1 | 1:1000 | ab39170 | Abcam |
| Rabbit anti-calpain-2 | 1:1000 | ab39168 | Abcam |
| Rabbit anti-calpain-10 | 1:1000 | ab28220 | Abcam |
| Rabbit anti-calpastatin | 1:1000 | #4146 | Cell Signaling |
| Rabbit anti-caspase-3 | 1:500 | sc-7148 | Santa Cruz |
| Rabbit anti-caspase-6 | 1:250 | sc-15381 | Santa Cruz |
| Rabbit anti-citrate synthase | 1:1000 | sb96600 | Abcam |
| Rabbit anti-dnm1l (Drp1) | 1:500 | NB1100-55237 | Novus Biologicals |
| Rabbit anti-FIS1 | 1:500 | ab96764 | Abcam |
| Rabbit anti-huntingtin | 1:1000 | clone D7F7. #5656 | Cell Signaling |
| Mouse anti-huntingtin | 1:1000 | clone HU-4C8. MAB2166 | EMD Millipore |
| Rabbit anti-IP3 receptor | 1:1000 | ab5804 | Abcam |
| Mouse anti-Mfn1 | 1:1000 | ab57602 | Abcam |
| Mouse anti-Mfn2 | 1:1000 | ab56889 | Abcam |
| Mouse anti-OPA1 | 1:2000 | 612606 | BD Bioscience |
| Mouse anti-polyglutamine | 1:1000 | clone 5TF1-1C2. MAB1574 | EMD Millipore |
| Mouse anti-α-spectrin | 1:1000 | clone AA6 | EMD Millipore |
| Mouse anti-TOM20 | 1:1000 | ab56783 | Abcam |
| Mouse anti-α-tubulin | 1:5000 | clone DM1A. CP06 | EMD Millipore |
| Rabbit anti-VCP/p97 | 1:250 | sc-20799 | Santa Cruz |
| Mouse anti-VDAC1 | 1:500 | ab14734 | Abcam |
| Goat anti-VDAC2 | 1:250 | ab37985 | Abcam |
| HRP-conjugated donkey anti-goat IgG | 1:5000 | sc-2056 | Santa Cruz |
| HRP-conjugated sheep anti-mouse IgG | 1:2500 | NXA931 | GE Healthcare |
| HRP-conjugated donkey anti-rabbit IgG | 1:2500 | NA934V | GE Healthcare |
| IRDye goat anti-mouse 680RD | 1:10,000 | 926-68070 | LICOR Biosciences |
| IRDye goat anti-mouse 800CW | 1:10,000 | 926-32210 | LICOR Biosciences |
| IRDye goat anti-rabbit 800CW | 1:10,000 | 926-32211 | LICOR Biosciences |
