# Supplementary material for: Olesoxime suppresses calpain activation and mutant huntingtin fragmentation in the BACHD rat
Source: Oxford University Press journal article supplement (doi:10.1093/brain/awv290), 2015-10-21
Supplement: awv290_Supplementary_Data.zip [file awv290_Supplementary_Data.zip › brain-2015-00779-File013.docx]

**Supplementary Table 2: Number of animals analyzed in each experiment.**

| **Figure** | **Parameter** | **Specification** | **WT** | **WT olsx** | **BACHD** | **BACHD olsx** |
| --- | --- | --- | --- | --- | --- | --- |
| 1A | SST reversal learning | - | 11 | 8 | 10 | 7 |
| 1B | EPM time on open arms | - | 5 | 6 | 4 | 4 |
| 1C | Hind limb clasping frequency | - | 15 | 15 | 15 | 15 |
| 1D | Rotarod latency to fall | 2 months | 15 | 15 | 14 | 15 |
| 4 months | 14 | 15 | 11 | 7 |
| 1E–G | MRI brain volume | Cerebrum volume | 8 | 12 | 7 | 11 |
| Striatum volume | 8 | 11 | 8 | 10 |
| Cortex thickness | 8 | 11 | 8 | 10 |
| 1H and I | Olesoxime levels | Cohort I plasma | - | 4 | - | 4 |
| Cohort II plasma | - | 8 | - | 9 |
| Cohort II brain | - | 4 | - | 4 |
| 3C | MHTT aggregation | Cortex | - | - | 2 | 4 |
| Striatum | - | - | 3 | 3 |
| 3D | MHTT soluble levels | - | 4 | 4 | 4 | 4 |
| 3E–G | MHTT fragmentation | Cortex | 4 | 4 | 4 | 4 |
| Striatum | 3 | 4 | 4 | 3 |
| 4A and B | Calpain activation | Cortex | 5 | 4 | 3 | 5 |
| Striatum | 4 | 5 | 4 | 3 |
| 4C | MHTT cleavage | - | 3 | - | 3 | - |
| 4D | MHTT cleavage | - | 1 | - | 1 | - |
| 5A and B | Mitochondrial mHTT and calpain | - | 4 | 4 | 4 | 4 |
| 5C | Mitochondrial respiration | - | 4 | 4 | 4 | 4 |
| 6A and B | Ca2+ signaling proteins | Cortex | 3 | 4 | 3 | 4 |
| Striatum | 3 | 4 | 4 | 3 |
