# Supplementary figures and images for: Olesoxime suppresses calpain activation and mutant huntingtin fragmentation in the BACHD rat
Source: Oxford University Press journal article supplement (doi:10.1093/brain/awv290), 2015-10-21

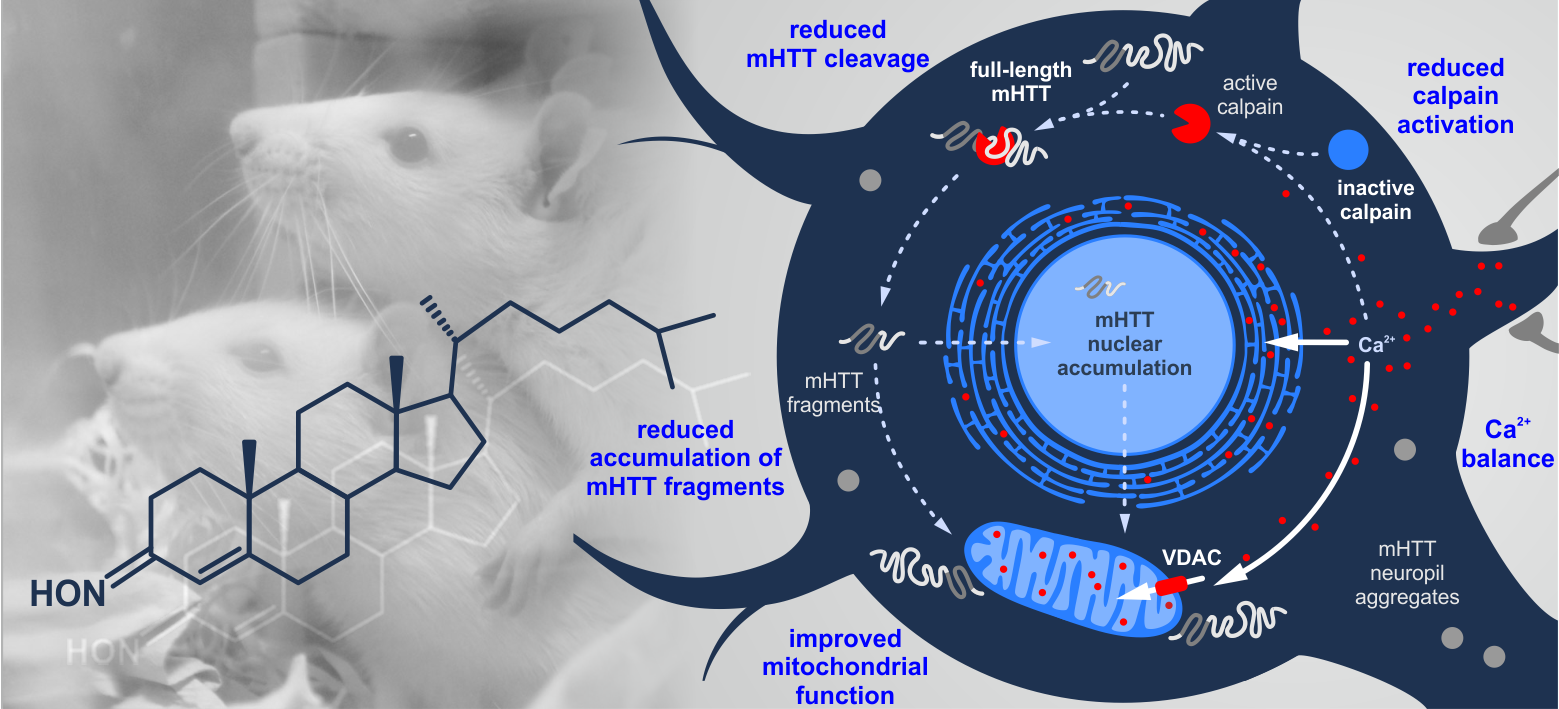

Supplement: awv290_Supplementary_Data.zip [file awv290_Supplementary_Data.zip › brain-2015-00779-File014.tif]
